# Supplementary material for: An Application of Imipenem Discs or P. aeruginosa ATCC 27853 Reference Strain Increases Sensitivity of Carbapenem Inactivation Method for Non-Fermenting Gram-Negative Bacteria
Source: MDPI journal article supplement (doi:10.3390/antibiotics10070875), 2021-07-19
Supplement: s1 [file s1]

**Table S1.** The origin of clinical and reference strains used in the study

| Clinical strains     |                      |               |      |
|----------------------|----------------------|---------------|------|
| Specimen origin      | Species              | <i>n</i> = 78 | %    |
| RTI ( <i>n</i> =34)  | <i>A. baumannii</i>  | 23            | 29.5 |
|                      | <i>P. aeruginosa</i> | 11            | 14.1 |
| SSTI ( <i>n</i> =18) | <i>A. baumannii</i>  | 11            | 14.1 |
|                      | <i>P. aeruginosa</i> | 7             | 9.0  |
| BSI ( <i>n</i> =10)  | <i>A. baumannii</i>  | 3             | 3.8  |
|                      | <i>P. aeruginosa</i> | 7             | 9.0  |
| IAI ( <i>n</i> =4)   | <i>A. baumannii</i>  | 1             | 1.3  |
|                      | <i>P. aeruginosa</i> | 3             | 3.8  |
| UTI ( <i>n</i> =4)   | <i>A. baumannii</i>  | 3             | 3.8  |
|                      | <i>P. aeruginosa</i> | 1             | 1.3  |
| GTI ( <i>n</i> =3)   | <i>P. aeruginosa</i> | 3             | 3.8  |
| CNSI ( <i>n</i> =1)  | <i>A. baumannii</i>  | 1             | 1.3  |
| Rest ( <i>n</i> =4)  | <i>P. aeruginosa</i> | 4             | 5.1  |

  

| Reference strains    |                       |                                                                                                                                                       |
|----------------------|-----------------------|-------------------------------------------------------------------------------------------------------------------------------------------------------|
| Species              | Collection and number | Reference                                                                                                                                             |
| <i>A. baumannii</i>  | DSM No. 102930        | <a href="https://www.dsmz.de/collection/catalogue/details/culture/DSM-102930">https://www.dsmz.de/collection/catalogue/details/culture/DSM-102930</a> |
| <i>A. baumannii</i>  | DSM No. 30008         | <a href="https://www.dsmz.de/collection/catalogue/details/culture/dsm-30008">https://www.dsmz.de/collection/catalogue/details/culture/dsm-30008</a>   |
| <i>P. aeruginosa</i> | ATCC No. 27853        | <a href="https://www.atcc.org/products/27853">https://www.atcc.org/products/27853</a>                                                                 |
| <i>E. coli</i>       | ATCC No. 25922        | <a href="https://www.atcc.org/products/25922">https://www.atcc.org/products/25922</a>                                                                 |

ATCC – American Type Culture Collection, BSI – blood stream infections, CNSI – central nervous system infection, DSM – German Collection of Microorganisms and Cell Cultures, GTI – gastrointestinal tract infections, IAI – intra-abdominal infection, *n* – number of strains, RTI – respiratory tract infection, SSTI – skin and soft tissue infections, UTI – urinary tract infection

**Table S2.** Methods used to detect the activity of carbapenemases and/or carbapenemases encoding genes in the tested and reference strains

| Strain                          | <i>n</i> | Carba NP/ CarbAcineto | Disc-diffusion method (EDTA test) | BD Phoenix NMIC-502 panel (Becton Dickinson) | CPE BD MAX Assay (Becton Dickinson) | eazyplex SuperBug CRE (Amplex Diagnostics) | Classification of the strain |
|---------------------------------|----------|-----------------------|-----------------------------------|----------------------------------------------|-------------------------------------|--------------------------------------------|------------------------------|
| <i>A. baumannii</i>             | 15       | +                     | NA                                | class D                                      | NA                                  | OXA-40                                     | carbapenemase-positive       |
|                                 | 10       | –                     | NA                                | class D                                      | NA                                  | OXA-23                                     |                              |
|                                 | 5        | –                     | NA                                | class D                                      | NA                                  | OXA-40                                     |                              |
|                                 | 4        | NA                    | NA                                | class D                                      | NA                                  | OXA-40                                     |                              |
|                                 | 2        | +                     | NA                                | class D                                      | NA                                  | OXA-23                                     |                              |
|                                 | 2        | –                     | NA                                | + (unidentified class)                       | NA                                  | OXA-23                                     |                              |
|                                 | 2        | –                     | NA                                | + (unidentified class)                       | NA                                  | OXA-40                                     |                              |
|                                 | 1        | +                     | NA                                | + (unidentified class)                       | NA                                  | OXA-23                                     |                              |
|                                 | 1        | +                     | NA                                | class D                                      | –                                   | OXA-40                                     |                              |
| <i>A. baumannii</i> DSM 102930  | 1        | +                     | +                                 | NA                                           | NDM                                 | NA                                         |                              |
| <i>A. baumannii</i> DSM 30008   | 1        | –                     | –                                 | NA                                           | NA                                  | –                                          | carbapenemase-negative       |
| <i>P. aeruginosa</i>            | 4        | +                     | +                                 | class B                                      | NA                                  | VIM                                        | carbapenemase-positive       |
|                                 | 2        | NA                    | +                                 | + (unidentified class)                       | NA                                  | NA                                         |                              |
|                                 | 1        | NA                    | +                                 | class B                                      | NA                                  | NA                                         |                              |
|                                 | 1        | +                     | +                                 | + (unidentified class)                       | NA                                  | NA                                         |                              |
|                                 | 1        | +                     | +                                 | class B                                      | NA                                  | NA                                         |                              |
|                                 | 1        | +                     | NA                                | + (unidentified class)                       | NA                                  | VIM                                        |                              |
|                                 | 1        | +                     | NA                                | class B                                      | NA                                  | VIM                                        |                              |
|                                 | 1        | +                     | +                                 | + (unidentified class)                       | NA                                  | VIM                                        |                              |
|                                 | 22       | –                     | –                                 | NA                                           | –                                   | NA                                         | carbapenemase-negative       |
|                                 | 2        | –                     | –                                 | –                                            | –                                   | NA                                         |                              |
| <i>P. aeruginosa</i> ATCC 27853 | 1        | –                     | –                                 | NA                                           | –                                   | NA                                         |                              |

– – negative result, + – positive result, ATCC – American Type Culture Collection, DSM – German Collection of Microorganisms and Cell Cultures, *n* – number of isolates, NA – not applicable
